# Supplementary material
Source: publisher figshare collection journal article supplement (https://rs.figshare.com/ndownloader/files/40858591)
Supplement: Supplementary file 1 [file 40858591]

## Sheet: Data
Supplementary data for 'Human locomotion over obstacles reveals real-time prediction of energy expenditure for optimised decision-making' (Daniels and Burn)
Article DOI: 10.1098/rspb.2023-0200
See ReadMe tab for column descriptors and units
P	D	L	t	sc	sce	sp	sc_n	sc_n+1	sc_n+2	sc_n+3	sce_n	sce_n+1	sce_n+2	sce_n+3
1	0.5	1.1	1	1.91	1.07	0.55	2.74	1.45	0.86	0.9	1.82	0.54	0.16	0.27
1	0.1	0.95	1	1.65	0.8	0.54	2.19	1.24	1.05	1.23	1.3	0.36	0.35	0.44
1	0.5	0.65	2	3.46	2.91	0.26	0.66	1.64	4.65	1.27	0.15	1.37	4.33	0.64
1	0.5	0.5	2	3.93	3.36	0.25	0.57	1.51	5.51	0.81	0.08	1.41	4.99	0.22
1	0.4	1.1	2	2.31	1.91	0.37	0.55	1.09	4.04	0.93	0.18	0.87	3.65	0.33
1	0.4	0.95	2	2.21	1.89	0.32	0.37	0.9	3.74	0.95	0.18	0.61	3.5	0.46
1	0.4	0.65	2	2.6	2.19	0.31	0.61	0.9	3.78	0.98	0.28	0.75	3.43	0.47
1	0.4	0.5	2	2.78	2.33	0.27	0.46	1	4	0.84	0.09	0.87	3.62	0.33
1	0.3	1.1	2	1.93	1.45	0.38	0.65	0.6	3.32	0.91	0.23	0.29	2.91	0.39
1	0.3	0.8	2	1.98	1.54	0.37	0.7	0.71	3.16	0.98	0.31	0.51	2.72	0.29
1	0.3	0.65	2	2.07	1.52	0.38	0.62	0.43	3.69	0.78	0.12	0.18	3.19	0.21
1	0.3	0.5	2	2.24	1.76	0.29	0.45	0.64	3.33	0.99	0.11	0.41	2.94	0.43
1	0.2	0.8	1	1.36	0.65	0.53	1.58	1.15	0.97	0.88	0.87	0.44	0.38	0.26
1	0.2	0.65	2	1.76	0.93	0.43	0.75	1.62	1.81	0.79	0.28	0.73	1.2	0.23
1	0.2	0.5	2	1.64	0.98	0.39	0.79	0.94	2.21	0.87	0.37	0.23	1.76	0.28
1	0.1	0.8	1	1.36	0.54	0.55	1.64	1.05	1.25	0.83	0.81	0.27	0.58	0.22
1	0.1	0.65	1	1.28	0.5	0.57	1.3	1.16	1.1	0.98	0.55	0.4	0.36	0.32
1	0.1	0.5	2	1.59	0.86	0.38	0.69	1.33	1.44	0.87	0.31	0.58	0.98	0.44
1	0.5	1.1	2	2.93	2.45	0.31	0.4	0.92	5.43	1.14	0.09	0.65	4.89	0.49
1	0.5	0.95	1	1.65	0.8	0.54	2.19	1.24	1.05	1.23	1.3	0.36	0.35	0.44
1	0.5	0.8	1	1.59	0.8	0.53	1.94	1.22	0.93	0.86	1.2	0.38	0.27	0.28
1	0.5	0.65	1	1.68	0.77	0.54	1.97	1.4	1.26	1.02	1.08	0.47	0.47	0.29
1	0.5	0.5	1	1.37	0.48	0.52	1.45	1.1	1.06	0.86	0.54	0.36	0.36	0.25
1	0.4	0.95	1	1.61	0.88	0.51	2.08	1.17	0.89	0.96	1.28	0.48	0.29	0.36
1	0.4	0.8	1	1.85	0.74	0.58	2.28	1.45	1.25	1.26	1.27	0.21	0.45	0.49
1	0.4	0.65	1	1.44	0.62	0.53	1.55	1.2	0.91	0.95	0.74	0.44	0.27	0.28
1	0.4	0.5	1	1.35	0.55	0.52	1.51	1.08	1.02	0.86	0.71	0.34	0.43	0.24
1	0.3	1.1	1	2.14	1.23	0.57	2.74	2.07	1.07	1.41	1.88	0.89	0.38	0.9
1	0.3	0.95	2	2.07	1.3	0.42	0.73	1.51	3.04	0.94	0.18	0.67	2.47	0.12
1	0.3	0.8	1	1.67	0.79	0.49	2.05	1.22	0.98	1.02	1.16	0.39	0.39	0.39
1	0.3	0.65	1	1.52	0.65	0.48	1.69	1.15	0.97	1.01	0.87	0.34	0.34	0.38
1	0.3	0.5	1	1.42	0.58	0.54	1.56	1.15	1.31	0.96	0.67	0.44	0.65	0.31
1	0.2	1.1	2	1.61	0.72	0.46	0.87	1.47	1.96	1.02	0.28	0.21	1.45	0.32
1	0.2	0.95	2	1.56	0.68	0.48	1.01	1.76	1.51	1.26	0.28	0.54	1.06	0.67
1	0.2	0.8	2	1.64	0.92	0.42	0.63	1.36	1.96	1.04	0.32	0.47	1.43	0.43
1	0.2	0.65	1	1.41	0.64	0.5	1.75	0.96	0.99	0.78	0.89	0.35	0.36	0.29
1	0.2	0.5	1	1.55	0.62	0.53	1.95	0.93	0.93	1.09	0.94	0.22	0.3	0.54
1	0.1	1.1	2	1.45	0.61	0.48	1.01	1.61	1.28	0.87	0.35	0.58	0.7	0.26
1	0.1	0.95	2	1.54	0.65	0.51	0.97	1.76	1.53	1.32	0.35	0.64	0.81	0.66
1	0.1	0.8	2	1.47	0.62	0.49	0.93	1.62	1.36	1.11	0.33	0.6	0.73	0.44
1	0.1	0.65	2	1.57	0.78	0.47	0.8	1.31	1.8	1.04	0.36	0.44	1.16	0.4
1	0.1	0.5	1	1.53	0.73	0.51	1.32	1.49	1.17	0.98	0.63	0.7	0.46	0.35
2	0.2	0.95	1	1.91	0.77	0.5	2.47	1.51	1.54	1.37	1.19	0.41	0.73	0.51
2	0.5	0.95	2	3.3	2.72	0.29	0.75	1.5	4.69	1.37	0.11	1.36	4.26	0.89
2	0.5	0.8	2	3.61	3.09	0.28	0.45	1.56	5.04	1.36	0.01	1.49	4.52	0.78
2	0.5	0.65	2	3.69	3.17	0.25	0.64	1.06	5.04	1.67	0.14	0.91	4.74	0.94
2	0.5	1.1	1	1.83	0.85	0.51	2.41	1.55	1.47	1.4	1.32	0.53	0.69	0.63
2	0.5	0.5	2	3.31	2.81	0.24	0.42	0.76	4.18	1.34	0.11	0.59	3.86	0.81
2	0.4	0.65	2	2.83	2.29	0.31	0.71	0.84	3.9	1.39	0.25	0.69	3.47	0.65
2	0.3	0.65	2	2.14	1.69	0.32	0.38	0.82	3.2	1.57	0.07	0.56	2.84	0.94
2	0.3	0.5	2	2.1	1.59	0.31	0.51	0.65	2.89	1.66	0.1	0.44	2.53	0.84
2	0.2	0.65	2	1.79	1.06	0.42	0.63	1.13	2.37	1.39	0.25	0.4	1.8	0.69
2	0.2	0.5	2	1.9	1.02	0.38	0.84	0.93	2.32	1.32	0.27	0.28	1.65	0.58
2	0.1	0.8	2	1.68	0.75	0.44	0.89	1.43	1.76	1.2	0.27	0.52	1.01	0.5
2	0.1	0.65	2	1.71	0.83	0.4	0.64	1.18	1.9	0.97	0.22	0.4	1.18	0.31
2	0.1	0.5	2	1.59	0.78	0.36	0.65	0.89	1.81	1.22	0.2	0.3	1.14	0.62
2	0.5	0.95	1	1.91	0.77	0.5	2.47	1.51	1.54	1.37	1.19	0.41	0.73	0.51
2	0.5	0.8	1	1.62	0.71	0.51	1.77	1.4	1.27	1.21	0.9	0.5	0.46	0.43
2	0.5	0.65	1	1.57	0.65	0.53	1.48	1.42	1.59	1.14	0.71	0.49	0.63	0.42
2	0.5	1.1	2	2.95	2.33	0.27	0.54	0.25	1.58	4.67	0.06	0.06	1.25	4.18
2	0.5	0.5	1	1.61	0.7	0.47	1.28	1.53	1.18	1.3	0.61	0.61	0.42	0.52
2	0.4	0.95	1	1.73	0.72	0.53	2.24	1.2	1.29	1.38	1.1	0.34	0.55	0.58
2	0.4	0.8	1	1.58	0.72	0.46	1.42	1.59	1.42	1.27	0.73	0.64	0.77	0.55
2	0.4	0.65	1	1.62	0.63	0.53	1.72	1.36	1.31	1.09	0.77	0.44	0.52	0.44
2	0.4	1.1	2	2.67	2.09	0.37	0.57	1.35	4.74	1.26	0.09	0.99	4.13	0.58
2	0.4	0.5	1	1.65	0.67	0.5	1.53	1.44	1.21	1.12	0.69	0.51	0.43	0.38
2	0.3	0.95	2	2.26	1.8	0.36	0.75	1.04	3.64	1.22	0.18	0.97	3.19	0.62
2	0.3	0.8	2	2.16	1.61	0.38	0.72	1.2	2.75	1.43	0.29	0.77	2.42	0.69
2	0.3	0.65	1	1.58	0.66	0.52	1.32	1.63	1.29	1.43	0.68	0.55	0.5	0.53
2	0.3	1.1	2	2.1	1.55	0.41	0.88	1.2	3.51	1.06	0.33	0.84	2.96	0.48
2	0.3	0.5	1	1.81	0.76	0.49	1.52	1.67	1.26	1.1	0.76	0.59	0.52	0.3
2	0.2	0.95	2	1.73	0.87	0.44	0.77	1.69	1.7	1.23	0.24	0.86	1.01	0.45
2	0.2	0.8	2	1.98	0.96	0.45	1.1	1.43	2.27	1.26	0.23	0.61	1.49	0.47
2	0.2	0.65	1	1.55	0.68	0.52	1.32	1.5	1.29	1.01	0.68	0.57	0.42	0.32
2	0.2	1.1	2	1.67	0.79	0.46	0.9	1.8	1.65	1.3	0.24	0.85	0.97	0.63
2	0.2	0.5	1	1.62	0.75	0.51	1.24	1.7	1.34	1.37	0.58	0.77	0.55	0.48
2	0.1	0.95	2	1.75	0.7	0.5	1.25	1.41	2.01	1.46	0.42	0.29	1.17	0.69
2	0.1	0.8	1	1.51	0.63	0.5	1.45	1.34	1.43	1.3	0.68	0.49	0.72	0.48
2	0.1	0.65	1	1.73	0.73	0.54	1.97	1.31	1.51	1.34	0.97	0.42	0.65	0.54
2	0.1	1.1	2	1.53	0.6	0.48	0.88	1.63	1.42	1.27	0.26	0.43	0.85	0.61
2	0.1	0.5	1	1.77	0.69	0.52	1.99	1.37	1.22	1.46	0.92	0.39	0.6	0.61
3	0.5	0.95	2	3.22	2.91	0.19	0.11	0.35	1	4.8	0	0.24	0.86	4.57
3	0.5	0.8	2	3.37	3.09	0.2	0.21	1.12	4.53	0.71	0.03	1.06	4.28	0.37
3	0.5	1.1	2	2.94	2.63	0.23	0.3	0.78	1.21	4.49	0.04	0.7	1.04	4.31
3	0.4	0.95	2	2.67	2.36	0.21	0.17	0.27	1.03	3.95	0	0.14	0.87	3.76
3	0.4	0.8	2	3.22	2.92	0.24	0.59	1.01	4.72	0.93	0.28	0.85	4.61	0.59
3	0.4	0.65	2	3.02	2.72	0.2	0.2	1.01	4.18	0.96	0	0.94	3.92	0.59
3	0.4	1.1	2	2.67	2.36	0.23	0.14	0.48	0.99	4.2	0	0.3	0.86	3.98
3	0.4	0.5	2	3.44	3.16	0.18	0.2	0.89	4.06	0.98	0.01	0.83	3.88	0.69
3	0.3	0.95	2	2.29	1.96	0.3	0.44	0.81	3.58	0.72	0.12	0.71	3.3	0.33
3	0.3	0.8	2	2.05	1.85	0.25	0.29	0.87	2.8	1.09	0.1	0.86	2.61	0.59
3	0.3	0.65	2	2.14	1.82	0.26	0.41	1.01	2.74	0.9	0.12	0.9	2.53	0.46
3	0.3	0.5	2	2.56	2.26	0.21	0.39	0.61	3.48	0.94	0.12	0.48	3.35	0.48
3	0.2	0.95	2	1.4	0.89	0.35	0.63	0.82	1.68	0.83	0.29	0.34	1.36	0.38
3	0.2	0.8	2	1.5	1.03	0.31	0.49	0.76	1.64	0.7	0.19	0.42	1.38	0.4
3	0.2	0.65	2	1.61	1.23	0.26	0.42	0.58	1.92	0.78	0.2	0.34	1.69	0.42
3	0.2	0.5	2	1.66	1.28	0.26	0.43	0.52	1.98	0.89	0.17	0.4	1.7	0.51
3	0.1	0.65	2	1.28	0.75	0.32	0.56	0.62	1.39	0.76	0.17	0.18	1.14	0.4
3	0.1	0.5	2	1.28	0.85	0.28	0.37	0.46	1.43	0.87	0.16	0.16	1.19	0.52
3	0.5	0.95	1	1.49	0.88	0.45	1.75	1.16	0.91	0.72	1.22	0.5	0.33	0.2
3	0.5	0.8	1	1.2	0.61	0.42	1.33	0.87	0.84	0.63	0.82	0.29	0.4	0.2
3	0.5	0.65	1	1.13	0.57	0.41	1.08	0.84	0.76	0.68	0.67	0.3	0.26	0.25
3	0.5	1.1	1	2.11	1.54	0.47	3.76	0.7	0.72	0.73	2.94	0.34	0.13	0.25
3	0.5	0.5	1	1.05	0.51	0.39	0.84	0.79	0.7	0.68	0.4	0.39	0.29	0.29
3	0.4	0.95	1	1.34	0.77	0.42	1.25	1.16	0.71	0.68	0.85	0.54	0.21	0.23
3	0.4	0.8	1	1.26	0.63	0.42	1.05	1.21	0.84	0.74	0.63	0.51	0.33	0.26
3	0.4	0.65	1	1.13	0.63	0.42	1.09	0.8	0.93	0.63	0.69	0.36	0.51	0.16
3	0.4	0.5	1	1.18	0.51	0.44	0.97	0.97	0.83	0.85	0.39	0.45	0.26	0.36
3	0.3	0.95	1	1.28	0.62	0.39	1.18	1.1	0.6	0.76	0.79	0.32	0.2	0.36
3	0.3	0.8	1	1.22	0.65	0.43	1.28	0.92	0.83	0.73	0.83	0.34	0.36	0.31
3	0.3	0.65	1	1.12	0.56	0.42	1.2	0.7	0.84	0.81	0.79	0.17	0.37	0.29
3	0.3	1.1	2	2.1	1.8	0.33	0.66	0.76	3.58	0.86	0.3	0.59	3.39	0.38
3	0.3	0.5	1	1.06	0.5	0.41	0.98	0.74	0.7	0.67	0.52	0.29	0.27	0.3
3	0.2	0.95	1	1.34	0.82	0.43	1.55	0.9	0.91	0.72	1.11	0.4	0.43	0.24
3	0.2	0.8	1	1.35	0.74	0.48	1.4	1.14	0.71	0.86	0.98	0.41	0.26	0.36
3	0.2	0.65	1	1.07	0.53	0.41	0.96	0.86	0.76	0.77	0.59	0.31	0.3	0.29
3	0.2	1.1	2	1.33	0.77	0.38	0.54	0.97	1.65	0.87	0.18	0.38	1.26	0.46
3	0.2	0.5	1	1.09	0.51	0.39	0.89	0.86	0.71	0.75	0.47	0.34	0.27	0.29
3	0.1	0.95	2	1.31	0.8	0.35	0.52	0.74	1.49	1.02	0.25	0.29	1.15	0.6
3	0.1	0.8	2	1.22	0.58	0.4	0.56	0.86	1.43	0.89	0.17	0.18	1	0.38
3	0.1	0.65	1	1.04	0.49	0.38	0.77	0.92	0.72	0.78	0.43	0.37	0.25	0.34
3	0.1	1.1	2	1.18	0.67	0.38	0.52	0.73	1.47	0.92	0.26	0.16	1.13	0.5
3	0.1	0.5	1	1.13	0.51	0.43	0.9	0.95	0.88	0.84	0.41	0.43	0.42	0.3
4	0.5	1.1	2	2.87	2.48	0.29	0.4	0.52	5.04	0.6	0.1	0.26	4.78	0.23
4	0.5	0.95	1	1.54	0.65	0.4	1.53	1.62	0.77	0.86	0.76	0.58	0.3	0.27
4	0.5	0.8	2	3.46	2.94	0.24	0.69	0.66	5.19	0.66	0.23	0.49	4.83	0.37
4	0.5	0.65	2	3.4	3	0.19	0.55	0.56	4.89	0.72	0.25	0.52	4.52	0.46
4	0.5	0.5	2	4.25	3.78	0.17	0.3	0.81	4.79	0.74	0.08	0.64	4.53	0.49
4	0.4	0.8	2	2.3	1.98	0.28	0.38	0.46	3.71	0.77	0.06	0.32	3.54	0.41
4	0.4	0.65	2	2.59	2.15	0.27	0.54	0.52	3.61	0.69	0.18	0.35	3.35	0.36
4	0.4	0.5	2	3.12	2.68	0.21	0.3	0.63	3.71	0.93	0.1	0.3	3.58	0.62
4	0.3	0.8	2	2.12	1.78	0.29	0.35	0.42	3.33	0.74	0.11	0.27	3.07	0.34
4	0.3	0.65	2	2.29	1.95	0.24	0.38	0.51	2.92	0.47	0.1	0.38	2.77	0.3
4	0.3	0.5	2	2.1	1.72	0.3	0.52	0.59	2.92	0.89	0.17	0.41	2.72	0.56
4	0.2	0.8	2	1.48	0.92	0.39	0.49	0.68	1.94	0.93	0.13	0.25	1.54	0.37
4	0.2	0.65	2	1.55	1.13	0.33	0.6	0.45	2.03	0.67	0.22	0.24	1.78	0.33
4	0.2	0.5	2	1.43	0.94	0.34	0.5	0.49	2	0.79	0.1	0.16	1.71	0.4
4	0.1	0.5	2	1.25	0.65	0.38	0.58	0.76	1.42	0.82	0.2	0.13	1.12	0.47
4	0.5	1.1	1	2.53	1.27	0.5	3.34	1.95	0.88	1	2.19	0.47	0.25	0.36
4	0.5	0.95	2	2.94	2.45	0.28	0.3	0.56	5.24	0.98	0.03	0.24	4.82	0.52
4	0.5	0.8	1	1.43	0.65	0.45	1.23	1.52	0.85	0.87	0.62	0.64	0.29	0.32
4	0.5	0.65	1	1.24	0.54	0.45	1.04	1.19	0.73	0.86	0.43	0.54	0.15	0.3
4	0.5	0.5	1	1.22	0.42	0.46	0.87	1.27	0.71	0.93	0.27	0.47	0.24	0.34
4	0.4	1.1	2	2.39	1.64	0.37	0.96	0.7	3.96	1.08	0.31	0.03	3.52	0.31
4	0.4	0.95	2	2.14	1.81	0.29	0.4	0.57	3.58	0.95	0.13	0.3	3.41	0.58
4	0.4	0.8	1	1.3	0.6	0.4	1.14	1.25	0.77	0.63	0.61	0.5	0.31	0.16
4	0.4	0.65	1	1.27	0.7	0.44	0.91	1.42	0.93	0.91	0.54	0.74	0.32	0.33
4	0.4	0.5	1	1.15	0.54	0.44	0.9	1.09	0.7	0.78	0.47	0.46	0.24	0.25
4	0.3	1.1	2	2.02	1.46	0.36	0.76	0.49	3.19	0.84	0.26	0.12	2.84	0.3
4	0.3	0.95	2	1.95	1.64	0.31	0.49	0.5	3.11	0.87	0.17	0.35	2.93	0.59
4	0.3	0.8	1	1.29	0.66	0.42	1.12	1.18	0.71	0.63	0.59	0.59	0.27	0.22
4	0.3	0.65	1	1.2	0.41	0.45	0.93	1.21	0.72	0.69	0.37	0.36	0.26	0.19
4	0.3	0.5	1	1.05	0.48	0.4	0.57	1.1	0.68	0.72	0.25	0.52	0.3	0.26
4	0.2	1.1	2	1.33	0.77	0.38	0.33	1.01	1.69	0.86	0.11	0.22	1.43	0.45
4	0.2	0.95	2	1.53	0.89	0.4	0.46	0.96	2.03	1.02	0.15	0.25	1.6	0.32
4	0.2	0.8	1	1.42	0.71	0.45	1.32	1.28	0.82	0.82	0.73	0.58	0.29	0.25
4	0.2	0.65	1	1.19	0.65	0.41	1.19	0.95	0.81	0.82	0.69	0.48	0.29	0.3
4	0.2	0.5	1	1.17	0.49	0.45	0.9	1.06	0.81	0.76	0.4	0.43	0.27	0.22
4	0.1	1.1	2	1.3	0.59	0.45	0.84	0.96	1.46	0.82	0.34	0.22	0.91	0.25
4	0.1	0.95	2	1.19	0.59	0.4	0.55	0.78	1.44	0.63	0.21	0.14	1.03	0.31
4	0.1	0.8	2	1.43	0.58	0.43	0.82	0.99	1.6	0.9	0.31	0.07	1.01	0.32
4	0.1	0.65	2	1.39	0.69	0.42	0.64	0.83	1.71	0.86	0.25	0.12	1.21	0.29
4	0.1	0.5	1	1.11	0.5	0.46	1.07	0.83	0.85	0.74	0.54	0.31	0.38	0.25
5	0.5	0.95	2	3.08	2.62	0.28	0.51	1.2	4.61	1.18	0.06	1.02	4.3	0.49
5	0.5	1.1	2	2.77	2.37	0.3	0.34	1.09	4.5	0.87	0	0.81	4.25	0.39
5	0.4	0.95	2	2.78	2.4	0.32	0.51	0.83	4.47	1.05	0.08	0.74	4.19	0.35
5	0.4	0.8	2	3.06	2.65	0.29	0.46	0.77	4.35	0.98	0.13	0.65	4.06	0.33
5	0.4	0.65	2	2.94	2.51	0.27	0.38	0.68	3.93	0.98	0.02	0.57	3.67	0.43
5	0.4	1.1	2	2.55	2.14	0.32	0.42	0.75	4	0.89	0.03	0.59	3.72	0.45
5	0.4	0.5	2	3.29	2.91	0.22	0.44	0.56	4.37	0.8	0.13	0.49	4.15	0.37
5	0.3	0.95	2	1.88	1.49	0.35	0.51	0.6	3.06	0.89	0.04	0.41	2.85	0.42
5	0.3	0.8	2	2.17	1.71	0.33	0.52	0.74	3.08	1.04	0.17	0.55	2.71	0.46
5	0.3	0.65	2	2.13	1.55	0.34	0.66	0.68	3.08	0.94	0.15	0.44	2.62	0.39
5	0.3	1.1	2	1.8	1.29	0.39	0.6	0.83	2.5	0.95	0.1	0.54	2.17	0.49
5	0.3	0.5	2	2.34	2.08	0.23	0.31	0.51	2.97	0.96	0.08	0.49	2.8	0.54
5	0.2	0.95	2	1.41	0.7	0.44	0.74	0.85	1.85	0.97	0.17	0.15	1.4	0.35
5	0.2	0.8	2	1.4	0.84	0.41	0.62	0.83	1.76	0.84	0.13	0.43	1.37	0.4
5	0.2	0.65	2	1.41	0.89	0.4	0.44	0.72	2.08	0.87	0.1	0.29	1.67	0.36
5	0.2	1.1	2	1.43	0.76	0.47	0.64	1.03	2.14	0.91	0.1	0.3	1.62	0.34
5	0.2	0.5	2	1.31	0.71	0.38	0.56	0.99	1.72	0.71	0.11	0.38	1.28	0.23
5	0.1	0.65	2	1.21	0.57	0.43	0.57	0.89	1.43	0.88	0.15	0.26	0.95	0.4
5	0.1	0.5	2	1.31	0.75	0.41	0.58	1.14	1.61	0.82	0.15	0.53	1.23	0.33
5	0.5	0.95	1	1.49	0.78	0.51	1.66	1.41	0.8	0.97	1.04	0.57	0.23	0.43
5	0.5	0.8	1	1.29	0.62	0.53	1.41	1.19	0.93	0.83	0.87	0.38	0.33	0.28
5	0.5	0.65	1	1.2	0.53	0.51	1.25	0.98	0.95	0.82	0.63	0.36	0.4	0.26
5	0.5	1.1	1	1.82	1.06	0.53	2.36	1.58	0.97	0.9	1.55	0.75	0.32	0.35
5	0.5	0.5	1	1.13	0.45	0.51	1.23	0.86	0.9	0.86	0.56	0.29	0.32	0.36
5	0.4	0.95	1	1.48	0.75	0.51	1.69	1.22	0.96	0.92	1.02	0.46	0.34	0.33
5	0.4	0.8	1	1.33	0.58	0.53	1.49	1.3	0.92	1.05	0.75	0.46	0.32	0.42
5	0.4	0.65	1	1.12	0.56	0.49	1.16	0.96	0.83	1	0.71	0.35	0.35	0.46
5	0.4	1.1	1	2.23	1.23	0.66	3.81	1.33	0.89	1	2.47	0.35	0.19	0.34
5	0.4	0.5	1	1.14	0.53	0.5	1.13	0.99	0.87	0.98	0.56	0.41	0.32	0.4
5	0.4	0.8	1	1.13	0.52	0.45	0.94	1.07	0.81	0.84	0.52	0.41	0.3	0.35
5	0.3	0.95	1	1.4	0.64	0.53	1.39	1.49	1.09	0.89	0.63	0.68	0.41	0.29
5	0.3	0.8	1	1.34	0.58	0.52	1.17	1.35	0.92	0.91	0.51	0.58	0.26	0.34
5	0.3	0.65	1	1.19	0.54	0.51	1.26	0.98	0.84	0.89	0.65	0.37	0.3	0.42
5	0.3	1.1	1	1.39	0.66	0.49	1.47	1.32	0.95	0.91	0.85	0.48	0.32	0.37
5	0.3	0.5	1	1.09	0.52	0.5	1.03	0.94	0.92	0.97	0.54	0.39	0.38	0.41
5	0.2	0.95	1	1.32	0.63	0.51	1.4	1.34	0.97	0.82	0.75	0.56	0.3	0.26
5	0.2	0.65	1	1.14	0.48	0.5	1.05	1.13	0.85	0.93	0.53	0.39	0.24	0.38
5	0.2	1.1	1	1.38	0.66	0.5	1.63	1.19	0.88	0.86	0.97	0.38	0.28	0.38
5	0.2	0.5	1	1.1	0.46	0.5	1.08	0.94	0.9	0.88	0.47	0.37	0.38	0.35
5	0.1	0.95	2	1.29	0.53	0.48	0.7	1.51	1.31	0.95	0.15	0.47	0.82	0.39
5	0.1	0.8	2	1.23	0.46	0.49	0.71	1.23	1.4	0.95	0.11	0.33	0.8	0.29
5	0.1	0.65	1	1.07	0.42	0.51	1.19	0.87	0.79	0.93	0.54	0.26	0.21	0.41
5	0.1	1.1	2	1.27	0.53	0.48	0.83	1.22	1.42	0.83	0.17	0.38	0.89	0.34
5	0.1	0.5	1	1.09	0.39	0.5	1.15	0.93	0.95	0.9	0.49	0.27	0.36	0.34
6	0.5	1.1	1	2.98	2	0.66	5.53	1.55	1.6	1.1	3.6	1.14	1.25	0.85
6	0.2	0.8	1	1.53	1.06	0.42	1.41	1.41	0.88	0.82	0.99	0.96	0.35	0.35
6	0.1	0.8	1	1.53	1.06	0.42	1.41	1.41	0.88	0.82	0.99	0.96	0.35	0.35
6	0.5	0.65	2	3.79	3.36	0.21	0.37	1.11	5.3	0.91	0.02	1	4.99	0.49
6	0.5	0.5	2	4.47	3.71	0.18	0.49	1.59	5.26	0.79	0	1.15	4.95	0.38
6	0.4	1.1	2	2.38	1.98	0.3	0.57	1.09	3.81	0.81	0.16	0.92	3.45	0.41
6	0.4	0.95	2	2.63	2.34	0.26	0.39	1.05	3.9	0.77	0.09	0.96	3.71	0.42
6	0.4	0.8	2	2.51	2.14	0.27	0.38	0.86	3.76	0.79	0.14	0.66	3.45	0.34
6	0.4	0.65	2	2.82	2.47	0.25	0.35	0.79	4.24	0.64	0.11	0.7	3.91	0.21
6	0.4	0.5	2	2.8	2.39	0.23	0.3	0.79	3.78	0.73	0.04	0.65	3.47	0.41
6	0.3	0.95	2	2.07	1.67	0.33	0.46	1.14	3.12	0.8	0.11	1	2.69	0.37
6	0.3	0.8	2	2.28	1.94	0.26	0.4	0.82	3	0.84	0.13	0.7	2.76	0.47
6	0.3	0.65	2	2.37	2.01	0.28	0.47	0.95	3.38	0.86	0.15	0.85	3.07	0.41
6	0.3	0.5	2	2.56	2.17	0.24	0.26	0.88	3.16	0.86	0.01	0.74	2.9	0.5
6	0.2	0.65	2	1.63	1.24	0.32	0.47	0.73	1.98	0.84	0.2	0.51	1.73	0.47
6	0.2	0.5	2	1.68	1.25	0.31	0.48	0.85	1.96	0.83	0.18	0.57	1.69	0.43
6	0.1	0.65	2	1.34	0.91	0.32	0.41	0.72	1.62	0.74	0.15	0.36	1.35	0.34
6	0.1	0.5	2	1.38	0.85	0.36	0.6	0.88	1.6	0.65	0.19	0.46	1.26	0.27
6	0.5	1.1	2	3.65	3.13	0.24	0.5	1.05	1.18	5.45	0.09	0.89	0.97	5.08
6	0.5	0.95	1	1.9	1.52	0.46	2.34	1.23	1.07	0.92	1.9	0.96	0.68	0.39
6	0.5	0.8	1	1.53	1.06	0.42	1.41	1.41	0.88	0.82	0.99	0.96	0.35	0.35
6	0.5	0.65	1	1.35	0.98	0.35	1.13	1.16	0.5	0.72	0.85	0.81	0.16	0.33
6	0.5	0.5	1	1.16	0.64	0.42	1.11	0.83	0.71	0.72	0.62	0.45	0.28	0.3
6	0.4	0.95	1	2.2	1.84	0.47	3.25	1.19	1.18	1.04	2.7	1.01	0.81	0.5
6	0.4	0.8	1	1.3	0.8	0.37	1.23	0.99	0.63	0.68	0.83	0.54	0.29	0.26
6	0.4	0.65	1	1.32	0.89	0.38	1.14	1.11	0.7	0.76	0.81	0.72	0.33	0.36
6	0.4	0.5	1	1.04	0.42	0.42	0.87	0.82	0.73	0.77	0.31	0.37	0.3	0.36
6	0.3	1.1	2	2.06	1.75	0.32	0.38	0.85	3.36	0.79	0.08	0.76	3.06	0.33
6	0.3	0.95	1	1.93	1.55	0.4	2.72	0.85	0.55	0.73	2.21	0.67	0.18	0.31
6	0.3	0.65	1	1.37	0.98	0.38	0.98	1.31	0.66	0.75	0.74	0.89	0.24	0.31
6	0.3	0.5	1	1.35	0.91	0.39	1.06	1.07	0.54	0.84	0.8	0.64	0.15	0.41
6	0.2	1.1	2	1.45	0.99	0.37	0.44	1.15	1.68	0.95	0.18	0.8	1.26	0.51
6	0.2	0.95	2	1.55	1.08	0.37	0.54	1.03	2.01	0.78	0.18	0.64	1.68	0.36
6	0.2	0.8	2	1.66	1.27	0.33	0.46	1.22	1.96	0.81	0.16	0.98	1.64	0.45
6	0.2	0.65	1	1.18	0.77	0.37	0.93	1	0.69	0.81	0.61	0.66	0.26	0.37
6	0.2	0.5	1	1.04	0.47	0.41	0.93	0.72	0.97	0.74	0.46	0.29	0.52	0.3
6	0.1	1.1	2	1.37	0.92	0.36	0.62	0.9	1.61	0.67	0.31	0.52	1.27	0.28
6	0.1	0.95	2	1.3	0.81	0.39	0.61	0.9	1.52	0.82	0.27	0.43	1.2	0.37
6	0.1	0.8	2	1.25	0.77	0.36	0.69	0.78	1.42	0.96	0.32	0.3	1.16	0.59
6	0.1	0.65	1	1.27	0.67	0.42	1.25	0.86	0.65	0.86	0.7	0.42	0.2	0.43
6	0.1	0.5	1	1.49	1.12	0.43	1.63	0.99	0.68	0.8	1.22	0.76	0.19	0.33
7	0.5	1.1	1	1.77	0.93	0.53	2.03	1.81	1.07	0.97	1.26	0.77	0.45	0.37
7	0.5	0.95	2	3.24	2.75	0.33	0.67	1.42	4.93	1.2	0.16	1.29	4.51	0.52
7	0.5	0.8	2	2.75	2.2	0.34	0.64	1.34	4.58	1.06	0.12	1.12	4.02	0.46
7	0.5	0.65	2	3.51	3.14	0.29	0.42	1.35	5.35	0.97	0.05	1.26	5.07	0.5
7	0.5	0.5	2	3.98	3.54	0.25	0.43	1.54	5.68	1.14	0.08	1.44	5.28	0.56
7	0.4	0.95	2	2.5	2.02	0.35	0.54	1.15	3.74	1.11	0.09	0.95	3.36	0.47
7	0.4	0.8	2	2.22	1.88	0.37	0.45	1.09	3.57	0.94	0.07	0.91	3.34	0.41
7	0.4	0.65	2	2.15	1.75	0.34	0.44	0.77	3.34	0.87	0.06	0.66	2.99	0.33
7	0.4	0.5	2	2.43	2	0.28	0.42	0.82	3.87	1.03	0.12	0.66	3.41	0.55
7	0.3	0.95	2	1.88	1.44	0.4	0.69	1.11	2.86	0.86	0.16	0.89	2.5	0.42
7	0.3	0.8	2	2.08	1.64	0.37	0.53	0.86	3.33	0.96	0.21	0.61	2.91	0.34
7	0.3	0.65	2	1.99	1.41	0.4	0.92	0.95	2.95	1.08	0.26	0.74	2.41	0.39
7	0.3	0.5	2	2.17	1.71	0.32	0.49	0.71	3.42	1.17	0.09	0.54	3	0.57
7	0.2	0.8	2	1.41	0.94	0.41	0.49	0.93	2.08	0.86	0.14	0.52	1.69	0.41
7	0.2	0.65	2	1.39	0.72	0.4	0.73	1.01	1.42	1.07	0.31	0.36	0.95	0.53
7	0.1	0.8	2	1.53	0.62	0.49	1.3	1.57	1.11	0.94	0.54	0.62	0.45	0.31
7	0.1	0.65	2	1.2	0.58	0.42	0.57	1.03	1.25	0.83	0.22	0.31	0.86	0.39
7	0.1	0.5	2	1.15	0.63	0.37	0.51	0.69	1.3	0.96	0.22	0.23	0.92	0.45
7	0.5	1.1	2	2.76	2.31	0.36	0.45	1.16	4.85	1.33	0.05	1.09	4.28	0.66
7	0.5	0.95	1	1.32	0.64	0.48	1.5	1.08	0.79	0.79	0.87	0.38	0.35	0.34
7	0.5	0.8	1	1.21	0.48	0.45	0.99	1.14	0.89	0.85	0.45	0.39	0.37	0.3
7	0.5	0.65	1	1.27	0.58	0.51	1.3	1.08	1.03	0.95	0.76	0.32	0.42	0.29
7	0.5	0.5	1	1.29	0.58	0.52	1.32	1.03	0.96	0.93	0.7	0.36	0.34	0.31
7	0.4	1.1	2	2.13	1.75	0.35	0.56	0.67	3.41	1.03	0.07	0.67	3.09	0.51
7	0.4	0.95	1	1.49	0.85	0.48	1.77	1.35	1.09	0.82	1.26	0.51	0.45	0.26
7	0.4	0.8	1	1.3	0.69	0.47	1.3	1.11	1.05	0.9	0.8	0.48	0.51	0.27
7	0.4	0.65	1	1.26	0.57	0.48	1.37	0.88	0.79	0.84	0.83	0.19	0.34	0.31
7	0.4	0.5	1	1.38	0.64	0.53	1.25	1.27	1.11	0.93	0.68	0.5	0.43	0.22
7	0.3	1.1	2	1.86	1.43	0.42	0.56	0.91	3.15	1.1	0.06	0.69	2.8	0.43
7	0.3	0.95	1	1.36	0.61	0.47	1.44	1.22	0.99	0.94	0.77	0.41	0.34	0.32
7	0.3	0.8	1	1.26	0.58	0.5	1.13	1.15	1.11	0.92	0.59	0.45	0.44	0.28
7	0.3	0.65	1	1.26	0.58	0.46	1.11	1.16	0.93	0.86	0.61	0.45	0.39	0.29
7	0.3	0.5	1	1.3	0.53	0.49	1.21	1.11	0.87	0.84	0.5	0.44	0.28	0.26
7	0.2	1.1	2	1.5	0.7	0.46	0.99	1.3	1.67	0.94	0.3	0.43	1.11	0.44
7	0.2	0.95	2	1.42	0.74	0.45	0.81	0.98	1.75	1.03	0.19	0.33	1.31	0.49
7	0.2	0.8	1	1.26	0.59	0.5	1.16	1.22	1.06	0.98	0.61	0.51	0.48	0.5
7	0.2	0.65	1	1.24	0.49	0.48	1.12	1.17	0.88	0.88	0.52	0.39	0.29	0.29
7	0.2	0.5	2	1.54	0.71	0.45	0.75	1.53	1.83	1.01	0.14	0.5	1.27	0.38
7	0.1	1.1	2	1.44	0.58	0.48	1.04	1.27	1.52	1.11	0.31	0.26	0.97	0.65
7	0.1	0.95	2	1.39	0.61	0.46	0.76	1.6	1.25	0.83	0.3	0.61	0.69	0.25
7	0.1	0.8	1	1.2	0.62	0.46	1.4	0.85	0.96	0.83	0.88	0.29	0.48	0.26
7	0.1	0.65	1	1.23	0.61	0.48	1.34	0.96	1.13	0.93	0.83	0.31	0.46	0.29
7	0.1	0.5	1	1.36	0.54	0.52	1.52	1.07	0.94	0.84	0.7	0.32	0.3	0.23
8	0.5	0.8	1	1.54	0.82	0.45	1.32	1.83	1.2	1.08	0.72	0.95	0.5	0.28
8	0.3	0.95	1	2.24	1.34	0.39	1.8	3.04	0.9	1.1	0.89	2.01	0.16	0.38
8	0.5	0.95	1	2.24	1.34	0.39	1.8	3.04	0.9	1.1	0.89	2.01	0.16	0.38
8	0.5	0.5	2	3.84	3.27	0.21	0.35	1.02	5.72	1.2	0	0.8	5.23	0.33
8	0.4	0.65	2	2.48	1.95	0.28	0.73	1.08	3.43	1.33	0.17	0.8	3.15	0.67
8	0.4	0.5	2	2.88	2.46	0.23	0.37	0.7	4.29	1.23	0	0.61	3.96	0.54
8	0.3	0.8	2	2.1	1.62	0.32	0.43	1.02	2.91	1.21	0	0.7	2.67	0.61
8	0.3	0.65	2	2.44	1.91	0.29	0.47	1	3.13	1.12	0.08	0.68	2.86	0.64
8	0.3	0.5	2	2.51	2.16	0.25	0.31	0.77	3.51	1.34	0	0.69	3.26	0.65
8	0.2	0.65	2	1.6	0.97	0.37	0.8	1.05	1.85	1.05	0.28	0.45	1.52	0.61
8	0.2	0.5	2	1.76	0.86	0.41	0.94	1.37	1.76	1.33	0.26	0.45	1.29	0.51
8	0.1	0.5	2	1.52	0.58	0.45	1.04	1.34	1.61	1.32	0.19	0.35	0.97	0.5
8	0.5	1.1	2	3.1	2.44	0.29	0.37	0.9	1.64	5.19	0	0.51	1	4.86
8	0.5	0.65	1	1.18	0.58	0.32	0.87	1.31	1.22	0.99	0.49	0.59	0.73	0.39
8	0.5	0.5	1	1.42	0.54	0.5	1.24	1.46	1.14	1.01	0.43	0.6	0.44	0.26
8	0.4	0.65	1	1.49	0.78	0.45	1.35	1.53	1.01	1.1	0.79	0.73	0.35	0.46
8	0.4	0.5	1	1.27	0.54	0.44	1	1.29	1.13	0.91	0.42	0.55	0.52	0.28
8	0.3	1.1	2	1.96	1.49	0.26	0.42	0.39	1.1	2.89	0.02	0.21	0.81	2.62
8	0.3	0.95	2	2.07	1.69	0.31	0.46	0.74	3.21	1.04	0.18	0.61	2.83	0.44
8	0.3	0.65	1	1.54	0.75	0.46	1.19	1.76	1.25	1.19	0.47	0.96	0.54	0.43
8	0.3	0.5	1	1.55	0.68	0.5	1.51	1.39	1.27	1.14	0.75	0.52	0.41	0.33
8	0.2	1.1	2	1.8	0.82	0.44	0.83	1.52	2.28	0.99	0.26	0.42	1.45	0.33
8	0.2	0.95	2	1.43	0.83	0.39	0.53	0.89	2.08	1.04	0.14	0.32	1.56	0.42
8	0.2	0.8	2	1.57	1.04	0.39	0.43	1.15	2	1.13	0.13	0.68	1.57	0.46
8	0.2	0.65	1	1.32	0.69	0.43	0.91	1.53	1.28	1.15	0.46	0.82	0.7	0.49
8	0.2	0.5	1	1.62	0.72	0.51	1.76	1.22	1.12	1.28	0.99	0.33	0.22	0.52
8	0.1	1.1	2	1.43	0.64	0.44	0.68	1.32	1.57	1.14	0.29	0.37	0.94	0.49
8	0.1	0.95	2	1.52	0.62	0.45	0.82	1.31	1.57	0.84	0.29	0.36	0.85	0.35
8	0.1	0.8	2	1.42	0.6	0.45	0.66	1.38	1.38	1.16	0.23	0.51	0.72	0.44
8	0.1	0.65	2	1.51	0.75	0.45	0.96	1.2	1.69	1.15	0.42	0.26	1.22	0.4
8	0.1	0.5	1	1.42	0.58	0.47	1.39	1.15	1.05	0.95	0.68	0.36	0.34	0.19
9	0.5	0.8	1	1.49	0.77	0.33	1.13	1.56	0.94	0.66	0.67	0.71	0.4	0.25
9	0.5	1.1	1	2.79	2	0.25	2.95	1.96	0.97	0.63	2.31	1.19	0.64	0.15
9	0.5	0.95	1	1.35	0.74	0.32	1.24	1.34	0.71	0.48	0.74	0.68	0.28	0.12
9	0.4	0.8	2	2.4	2.06	0.25	0.19	0.83	3.52	0.78	0.01	0.62	3.27	0.42
9	0.2	0.65	2	1.73	1.2	0.33	0.34	0.92	1.73	0.79	0.13	0.45	1.5	0.33
9	0.2	0.5	2	1.64	1.25	0.29	0.36	0.65	2.15	0.69	0.16	0.37	1.87	0.32
9	0.1	0.65	2	1.25	0.85	0.3	0.36	0.6	1.43	0.72	0.2	0.24	1.19	0.38
9	0.1	0.5	2	1.43	0.92	0.32	0.43	0.66	1.53	0.68	0.14	0.3	1.25	0.34
9	0.5	1.1	2	3.06	2.65	0.22	0.48	0.52	1.11	5.28	0.14	0.37	0.9	4.99
9	0.5	0.65	1	0.92	0.49	0.33	0.85	0.66	0.87	0.7	0.53	0.27	0.49	0.34
9	0.5	0.5	1	0.95	0.55	0.37	0.73	0.79	0.83	0.7	0.5	0.39	0.43	0.34
9	0.4	1.1	2	2.17	1.94	0.25	0.27	0.84	3.48	0.54	0.1	0.75	3.26	0.3
9	0.4	0.65	1	1.02	0.59	0.37	0.89	0.83	0.87	0.63	0.61	0.39	0.48	0.29
9	0.4	0.5	1	1.24	0.64	0.44	1.02	1.08	0.88	0.78	0.63	0.45	0.42	0.27
9	0.3	0.95	2	1.87	1.58	0.28	0.28	0.8	2.89	0.72	0.09	0.67	2.6	0.35
9	0.3	0.8	2	1.98	1.65	0.28	0.2	0.8	2.91	0.65	0	0.65	2.62	0.29
9	0.3	0.65	1	1.08	0.62	0.37	1.02	0.86	0.62	0.75	0.71	0.36	0.19	0.38
9	0.3	0.5	1	1.1	0.58	0.38	0.89	0.82	0.78	0.63	0.51	0.39	0.41	0.26
9	0.2	1.1	2	1.51	1.04	0.31	0.51	0.25	1.17	2.14	0.28	0	0.79	1.75
9	0.2	0.95	2	1.53	0.93	0.38	0.45	0.97	1.84	0.86	0.19	0.36	1.43	0.36
9	0.2	0.8	2	1.38	0.95	0.35	0.4	0.75	1.88	0.75	0.18	0.32	1.58	0.34
9	0.2	0.65	1	1.06	0.59	0.38	0.93	0.89	0.83	0.8	0.63	0.39	0.4	0.37
9	0.2	0.5	1	0.96	0.49	0.39	0.7	0.85	0.73	0.67	0.38	0.41	0.39	0.32
9	0.1	1.1	2	1.07	0.58	0.36	0.45	0.72	1.33	0.61	0.2	0.19	0.99	0.28
9	0.1	0.95	2	1.39	0.81	0.39	0.46	0.93	1.77	0.76	0.24	0.28	1.32	0.37
9	0.1	0.8	2	1.22	0.71	0.34	0.53	0.82	1.46	0.68	0.26	0.29	1.09	0.29
9	0.1	0.65	1	1.04	0.53	0.38	1	0.74	0.77	0.91	0.65	0.24	0.4	0.51
9	0.1	0.5	1	1.01	0.55	0.38	0.58	1.03	0.76	0.73	0.36	0.52	0.39	0.33
10	0.5	0.8	2	2.68	2.19	0.36	0.44	1.57	4.32	1.08	0.06	1.31	3.79	0.5
10	0.5	0.65	2	2.92	2.34	0.34	0.68	1.94	5.4	1.21	0	1.62	4.79	0.4
10	0.5	1.1	2	2.86	2.27	0.36	0.35	0.74	1.39	5.51	0	0.4	0.96	4.98
10	0.5	0.5	2	3.46	2.89	0.29	0.63	1.58	5.41	0.94	0.01	1.32	5.05	0.45
10	0.4	0.95	2	2.48	1.91	0.42	0.69	1.58	4.77	1.63	0.07	1.32	4.05	1
10	0.4	0.8	2	2.49	2.03	0.39	0.37	1.55	5.09	1.11	0.01	1.37	4.33	0.34
10	0.4	0.65	2	3.03	2.54	0.35	0.45	1.62	5.5	1.04	0.02	1.34	4.99	0.28
10	0.3	0.8	2	2	1.57	0.39	0.32	1.14	3.45	1.09	0.01	0.84	3.01	0.38
10	0.3	0.5	2	2.61	2.08	0.36	0.73	1.88	3.96	0.97	0.08	1.57	3.59	0.31
10	0.2	0.8	2	1.58	0.8	0.47	0.98	1.35	1.86	1.06	0.24	0.63	1.26	0.37
10	0.2	0.65	2	1.68	0.74	0.52	0.98	1.74	2.45	1.38	0.2	0.56	1.54	0.56
10	0.2	0.5	2	1.63	0.89	0.49	0.97	1.14	2.61	1.26	0.24	0.45	1.88	0.52
10	0.1	0.8	2	1.6	0.67	0.52	1.24	1.47	1.9	1.2	0.24	0.56	1.14	0.43
10	0.1	0.65	2	1.47	0.65	0.49	0.84	1.57	1.97	0.91	0.21	0.61	1.12	0.23
10	0.5	0.95	1	1.54	0.9	0.53	1.26	2.02	1.26	1	0.72	1.19	0.51	0.43
10	0.5	0.8	1	1.35	0.67	0.51	1.26	1.41	1.09	1.07	0.67	0.65	0.42	0.39
10	0.5	0.65	1	1.46	0.79	0.52	1.61	1.26	1.08	1.12	1.03	0.53	0.44	0.51
10	0.5	1.1	1	1.8	0.99	0.61	1.99	2.37	1.35	1.1	0.99	1.41	0.69	0.37
10	0.5	0.5	1	1.42	0.65	0.53	1.34	1.32	0.93	1.03	0.78	0.44	0.31	0.26
10	0.4	0.95	1	1.92	1.18	0.62	2.42	2.44	1.46	1.4	1.62	1.38	0.6	0.87
10	0.4	0.8	1	1.54	0.83	0.53	1.7	1.58	0.85	1	1.07	0.7	0.28	0.2
10	0.4	0.65	1	1.32	0.55	0.53	1.51	1.13	1.14	0.81	0.74	0.36	0.39	0.21
10	0.4	1.1	2	3.05	2.5	0.39	0.71	2.62	5	1.45	0.04	2.28	4.49	0.66
10	0.4	0.5	1	1.58	0.89	0.52	1.51	1.71	1.02	1.1	1.01	0.8	0.32	0.37
10	0.3	0.95	2	2.04	1.53	0.42	0.69	2.11	3.1	0.86	0.17	1.66	2.6	0.26
10	0.3	0.8	1	1.38	0.76	0.52	1.6	1.35	1.13	1.04	1.04	0.58	0.45	0.28
10	0.3	0.65	2	2	1.52	0.43	0.81	1.29	3.53	1.11	0.22	0.95	3.1	0.51
10	0.3	1.1	2	2.15	1.69	0.4	0.46	2.22	3.2	0.98	0.14	1.86	2.62	0.29
10	0.3	0.5	1	1.3	0.64	0.51	1.23	1.31	0.81	1.02	0.76	0.5	0.26	0.29
10	0.2	0.95	2	1.63	0.83	0.49	0.74	1.59	2.45	1.16	0.14	0.66	1.64	0.39
10	0.2	0.8	1	1.51	0.81	0.57	1.81	1.42	1.26	0.8	1.03	0.71	0.43	0.16
10	0.2	0.65	1	1.41	0.65	0.53	1.5	1.4	1.06	1.11	0.78	0.56	0.34	0.47
10	0.2	1.1	2	1.63	0.85	0.48	0.67	1.81	2.4	1.26	0.16	0.8	1.57	0.66
10	0.2	0.5	1	1.56	0.73	0.56	1.61	1.68	1.15	0.92	0.78	0.75	0.33	0.32
10	0.1	0.95	2	1.35	0.54	0.48	0.71	0.93	1.86	0.92	0.16	0.12	1.13	0.31
10	0.1	0.8	2	1.33	0.62	0.47	0.67	1.73	1.6	0.94	0.2	0.84	0.83	0.32
10	0.1	1.1	2	1.47	0.69	0.5	0.78	2.18	1.72	1.05	0.26	1.14	0.8	0.34
10	0.1	0.5	2	1.46	0.66	0.49	0.8	1.35	1.96	1.08	0.2	0.45	1.22	0.39
11	0.5	1.1	2	2.8	2.5	0.31	0.32	0.89	4.55	0.79	0	0.8	4.34	0.4
11	0.5	0.65	2	3.77	3.39	0.21	0.33	1.08	4.69	1.19	0	0.98	4.5	0.81
11	0.5	0.5	2	4.32	3.71	0.22	0.71	1.15	5.21	0.96	0.07	1.02	4.98	0.44
11	0.4	1.1	2	2.36	1.97	0.33	0.45	0.87	3.5	0.72	0.06	0.75	3.21	0.31
11	0.4	0.95	2	2.77	1.93	0.39	0.6	3.51	1.51	0.89	0.15	2.62	1.14	0.5
11	0.4	0.8	2	3.02	1.99	0.46	1.95	2.44	2.43	0.97	0.71	2.03	1.74	0.49
11	0.4	0.65	2	2.58	2.19	0.31	0.33	1.16	3.58	0.91	0.03	1.05	3.24	0.42
11	0.4	0.5	2	2.89	2.47	0.25	0.43	1.29	3.31	0.71	0.11	1.07	3.1	0.42
11	0.3	1.1	2	1.76	1.35	0.34	0.35	0.72	2.65	0.72	0.01	0.45	2.39	0.3
11	0.3	0.95	2	1.65	1.11	0.4	0.54	1.11	2.38	0.86	0.17	0.51	2.01	0.41
11	0.3	0.8	2	2.32	1.45	0.45	0.58	2.76	1.89	0.86	0.11	1.95	1.21	0.3
11	0.3	0.65	2	2.31	1.45	0.41	0.81	2.37	1.79	0.81	0.24	1.73	1.16	0.33
11	0.3	0.5	2	2.17	1.8	0.32	0.62	0.67	3.07	0.74	0.27	0.56	2.8	0.33
11	0.2	1.1	2	1.49	0.95	0.37	0.55	0.84	1.87	0.58	0.11	0.32	1.65	0.22
11	0.2	0.8	2	1.65	1.08	0.38	0.4	1	2.07	0.67	0.04	0.5	1.72	0.19
11	0.2	0.65	2	1.89	1.2	0.39	0.59	1.01	2.45	1	0.2	0.42	1.95	0.48
11	0.2	0.5	2	1.8	1.33	0.32	0.47	0.64	2.27	0.83	0.21	0.33	1.96	0.4
11	0.1	0.5	2	1.32	0.9	0.34	0.5	0.78	1.45	0.84	0.21	0.41	1.22	0.39
11	0.5	0.95	1	1.5	0.81	0.5	1.55	1.06	0.63	0.7	1.04	0.37	0.17	0.27
11	0.5	0.8	1	2	1.26	0.6	2.82	0.96	0.84	1.11	1.83	0.55	0.21	0.45
11	0.5	0.65	1	1.24	0.55	0.51	1.27	0.83	0.77	0.88	0.7	0.22	0.24	0.32
11	0.5	0.5	1	1.12	0.54	0.45	1.01	0.83	0.76	0.7	0.49	0.39	0.28	0.27
11	0.4	1.1	1	2.2	1.64	0.57	3.22	1.08	0.95	0.72	2.38	0.83	0.53	0.25
11	0.4	0.95	1	2.08	1.28	0.53	2.22	1.63	0.84	0.87	1.55	0.82	0.31	0.24
11	0.4	0.8	1	1.3	0.67	0.45	1.12	1.18	0.73	0.94	0.63	0.55	0.28	0.46
11	0.4	0.65	1	1.32	0.77	0.49	1.41	1.02	0.81	0.85	0.93	0.49	0.34	0.46
11	0.4	0.5	1	1.13	0.57	0.42	0.89	0.98	0.74	0.82	0.48	0.46	0.31	0.37
11	0.3	1.1	1	2.08	1.24	0.6	3.25	0.94	1.24	1.04	2.26	0.24	0.75	0.43
11	0.3	0.95	1	1.48	0.86	0.51	1.7	1.15	1.1	0.76	1.16	0.49	0.55	0.21
11	0.3	0.8	1	1.26	0.6	0.51	1.34	0.91	1.01	0.91	0.74	0.33	0.46	0.43
11	0.3	0.65	1	1.23	0.52	0.51	1.29	0.89	0.83	0.73	0.62	0.3	0.27	0.22
11	0.3	0.5	1	1.18	0.5	0.46	0.94	0.97	0.99	0.97	0.39	0.41	0.42	0.42
11	0.2	1.1	1	2.16	1.55	0.56	2.99	1.35	1	1.24	2.34	0.78	0.5	0.39
11	0.2	0.95	2	1.94	1.17	0.43	0.56	2.6	1.47	0.69	0.18	1.64	0.97	0.27
11	0.2	0.65	1	1.26	0.53	0.56	1.36	0.95	1.08	1.17	0.71	0.27	0.43	0.6
11	0.2	0.5	1	1.34	0.57	0.54	1.29	1.01	0.95	1.02	0.56	0.41	0.28	0.41
11	0.1	1.1	2	1.48	0.62	0.49	0.98	1.24	1.56	0.82	0.38	0.25	0.95	0.14
11	0.1	0.95	2	1.44	0.51	0.48	0.87	1.37	1.38	1.05	0.31	0.28	0.68	0.45
11	0.1	0.8	2	1.51	0.67	0.46	0.73	1.41	1.44	0.83	0.27	0.49	0.83	0.32
11	0.1	0.65	2	1.73	0.85	0.47	0.79	1.85	1.24	1.01	0.25	1.04	0.62	0.41
11	0.1	0.5	1	1.06	0.5	0.48	0.92	0.82	0.79	0.91	0.5	0.32	0.31	0.42
12	0.5	1.1	2	3.22	2.89	0.27	0.17	1.13	5.14	0.94	0	0.97	4.82	0.52
12	0.5	0.95	2	3.68	3.38	0.27	0.21	1.19	5.16	0.75	0	1.07	4.96	0.28
12	0.5	0.65	2	3.61	3.3	0.26	0.27	1.2	5.78	0.83	0	1.12	5.51	0.41
12	0.5	0.5	2	4.84	4.52	0.14	0.2	1.23	4.53	0.68	0	1.22	4.36	0.49
12	0.4	1.1	2	2.42	2.18	0.3	0.34	0.64	3.96	0.68	0.07	0.6	3.79	0.3
12	0.4	0.95	2	2.47	2.13	0.31	0.55	1.1	3.49	0.65	0.14	1.01	3.29	0.26
12	0.4	0.8	2	2.38	2.07	0.31	0.47	0.95	3.87	0.87	0.1	0.87	3.63	0.6
12	0.4	0.65	2	2.81	2.54	0.24	0.25	1.01	3.94	0.63	0.04	0.94	3.72	0.3
12	0.4	0.5	2	2.91	2.57	0.23	0.39	1.05	3.72	0.62	0.09	0.99	3.47	0.35
12	0.3	1.1	2	1.9	1.54	0.35	0.48	0.82	2.89	0.65	0.14	0.6	2.66	0.24
12	0.3	0.8	2	2	1.47	0.36	0.51	1.26	2.69	0.77	0.18	0.84	2.28	0.25
12	0.3	0.5	2	2.32	2.03	0.22	0.16	0.62	2.94	0.56	0	0.54	2.72	0.31
12	0.2	0.8	2	1.57	0.92	0.38	0.75	1.4	1.32	0.49	0.28	0.88	0.87	0.14
12	0.2	0.65	2	1.52	0.92	0.39	0.8	1.39	1.37	0.74	0.26	0.93	0.95	0.29
12	0.2	0.5	2	1.72	1.3	0.28	0.4	0.96	1.98	0.64	0.09	0.72	1.71	0.29
12	0.1	0.65	2	1.22	0.69	0.39	0.7	0.99	1.2	0.65	0.37	0.5	0.77	0.33
12	0.1	0.5	2	1.31	0.68	0.39	0.82	1.01	1.31	0.42	0.31	0.47	0.84	0.05
12	0.5	1.1	1	2.35	1.46	0.57	3.39	1.39	0.69	0.57	2.3	0.68	0.35	0.18
12	0.5	0.95	1	1.6	0.97	0.45	1.86	1.33	0.96	0.52	1.17	0.76	0.39	0.04
12	0.5	0.8	1	1.34	0.65	0.37	1.15	1.2	0.7	0.62	0.54	0.6	0.28	0.22
12	0.5	0.65	1	1.34	0.65	0.45	1.37	1.07	0.86	0.71	0.75	0.44	0.33	0.2
12	0.5	0.5	1	1.19	0.47	0.45	1.01	1.01	0.77	1.04	0.43	0.37	0.14	0.53
12	0.4	1.1	1	2.43	1.59	0.61	4.19	1.36	1.03	0.83	2.83	0.8	0.42	0.27
12	0.4	0.95	1	1.94	1.04	0.54	2.43	1.48	1.17	0.72	1.4	0.7	0.49	0.16
12	0.4	0.8	1	1.47	0.65	0.51	1.58	1.2	0.94	0.88	0.83	0.41	0.3	0.3
12	0.4	0.65	1	1.1	0.47	0.46	1.05	0.96	0.6	0.88	0.52	0.34	0.12	0.36
12	0.4	0.5	1	1.1	0.47	0.42	0.85	0.87	0.85	0.79	0.39	0.35	0.33	0.31
12	0.3	1.1	1	2.43	1.49	0.53	3.61	1.39	1.27	0.93	2.26	0.79	0.7	0.44
12	0.3	0.95	2	1.98	1.66	0.3	0.19	1.02	2.55	0.69	0.01	0.85	2.29	0.3
12	0.3	0.8	1	1.25	0.66	0.41	1.16	1.03	0.72	0.78	0.74	0.42	0.28	0.34
12	0.3	0.65	1	1.2	0.53	0.46	0.98	1.19	0.77	1.06	0.48	0.48	0.26	0.52
12	0.3	0.5	1	1.15	0.55	0.45	0.9	0.97	0.73	0.97	0.45	0.44	0.21	0.44
12	0.2	1.1	2	1.64	0.9	0.43	0.84	1.28	1.92	0.75	0.24	0.69	1.29	0.24
12	0.2	0.95	2	1.68	0.98	0.42	0.75	1.58	1.64	0.71	0.27	1	1.03	0.26
12	0.2	0.8	1	1.3	0.75	0.43	1.42	0.99	0.82	0.64	0.93	0.45	0.42	0.22
12	0.2	0.65	1	1.37	0.58	0.47	1.49	0.96	0.9	0.77	0.7	0.34	0.32	0.24
12	0.2	0.5	1	1.16	0.57	0.44	0.84	1.03	0.61	0.78	0.42	0.5	0.12	0.21
12	0.1	1.1	2	1.45	0.71	0.46	1.11	1.3	1.51	0.86	0.35	0.71	0.84	0.3
12	0.1	0.95	2	1.3	0.6	0.39	0.67	1.17	1.42	0.87	0.21	0.47	0.84	0.33
12	0.1	0.8	2	1.34	0.65	0.42	0.77	1.12	1.46	0.74	0.22	0.49	0.91	0.26
12	0.1	0.65	1	1.16	0.53	0.44	1.12	0.9	0.92	0.72	0.64	0.29	0.39	0.23
12	0.1	0.5	1	0.98	0.42	0.41	0.82	0.79	0.59	0.89	0.46	0.23	0.15	0.5
13	0.5	0.95	2	3.41	2.98	0.26	0.43	1.33	4.86	1.02	0.13	1.16	4.48	0.64
13	0.5	0.8	2	3.6	3.14	0.27	0.4	1.51	5.2	1.24	0.04	1.38	4.79	0.55
13	0.5	0.5	2	3.23	2.89	0.23	0.23	1.09	4.85	1.39	0	1	4.51	0.78
13	0.4	0.8	2	2.91	2.57	0.27	0.33	1.18	4.48	1.08	0.07	1.05	4.18	0.54
13	0.4	0.65	2	3.01	2.61	0.26	0.26	0.9	4.7	0.81	0.04	0.79	4.25	0.22
13	0.4	1.1	2	2.72	2.26	0.34	0.42	1.06	5.16	1.15	0.03	0.87	4.63	0.38
13	0.4	0.5	2	3.18	2.68	0.25	0.25	1.11	4.65	1.15	0	0.94	4.13	0.42
13	0.3	0.95	2	2.12	1.63	0.36	0.62	2.74	1.21	1.21	0.23	2.25	1.02	0.7
13	0.3	0.8	2	2.17	1.84	0.32	0.45	0.88	3.33	0.91	0.15	0.73	3.07	0.43
13	0.3	0.65	2	2.11	1.78	0.31	0.43	0.88	3.41	0.88	0.13	0.74	3.1	0.33
13	0.3	1.1	2	2.12	1.28	0.45	0.49	3.66	1.28	1.07	0.12	2.33	0.85	0.3
13	0.3	0.5	2	2.38	1.9	0.29	0.56	0.68	3.52	0.89	0.15	0.56	3.08	0.37
13	0.2	0.95	2	1.53	0.9	0.41	0.74	1.04	1.67	1.03	0.29	0.5	1.24	0.45
13	0.2	0.8	2	1.64	1.13	0.4	0.63	0.94	2.32	0.7	0.26	0.6	1.81	0.25
13	0.2	0.65	2	1.4	0.94	0.35	0.45	0.81	1.84	0.85	0.22	0.45	1.42	0.45
13	0.2	1.1	2	1.5	0.76	0.42	0.76	1.17	1.74	0.9	0.2	0.48	1.18	0.32
13	0.2	0.5	2	1.73	1.2	0.34	0.49	0.72	2.29	0.98	0.15	0.51	1.77	0.38
13	0.1	0.95	2	1.25	0.54	0.43	0.8	0.98	1.29	0.93	0.28	0.27	0.77	0.34
13	0.1	0.8	2	1.38	0.6	0.4	0.59	1.23	1.28	0.93	0.33	0.26	0.77	0.37
13	0.1	0.65	2	1.32	0.7	0.4	0.56	1.09	1.52	0.82	0.23	0.46	0.98	0.3
13	0.1	0.5	2	1.28	0.74	0.37	0.6	0.82	1.53	0.82	0.25	0.34	1.11	0.34
13	0.5	0.95	1	2.33	1.37	0.57	3.88	0.95	1.16	1.14	2.46	0.37	0.36	0.37
13	0.5	0.8	1	1.94	0.99	0.52	2.62	1.04	1.02	1.06	1.58	0.28	0.33	0.26
13	0.5	0.65	1	1.42	0.57	0.47	1.52	1.06	1.03	0.84	0.73	0.31	0.37	0.21
13	0.5	1.1	1	2.6	1.61	0.56	4.86	0.87	0.84	0.75	3.32	0.23	0.14	0.14
13	0.5	0.5	1	1.35	0.58	0.48	1.22	1.16	1	0.93	0.66	0.38	0.35	0.26
13	0.4	0.95	1	2.02	1.03	0.47	2.37	1.81	0.96	0.89	1.51	0.62	0.31	0.2
13	0.4	0.8	1	1.8	0.98	0.51	2.54	1.02	1.16	0.83	1.59	0.35	0.4	0.21
13	0.4	0.65	1	1.29	0.52	0.5	1.2	1.07	1.08	0.97	0.64	0.27	0.38	0.31
13	0.4	1.1	1	2.55	1.52	0.6	4.49	1.26	0.92	1.16	3.01	0.43	0.29	0.38
13	0.4	0.5	1	1.24	0.56	0.42	1.19	0.92	0.95	0.73	0.71	0.25	0.34	0.22
13	0.3	0.95	1	2.09	1.28	0.53	3.07	1.28	1.3	1.07	2.08	0.59	0.51	0.3
13	0.3	0.8	1	1.48	0.66	0.52	1.56	1.21	1.07	0.89	0.93	0.31	0.42	0.23
13	0.3	0.65	1	1.29	0.51	0.49	1.15	1.18	0.83	0.91	0.63	0.3	0.2	0.26
13	0.3	1.1	1	2.41	1.54	0.58	4.45	0.97	1.03	0.94	3.09	0.39	0.29	0.14
13	0.3	0.5	1	1.25	0.5	0.48	1.13	1.06	1.02	0.86	0.56	0.32	0.33	0.23
13	0.2	0.95	1	1.41	0.75	0.48	1.46	1.15	0.86	0.82	0.98	0.41	0.3	0.25
13	0.2	0.8	1	1.44	0.67	0.49	1.51	1.13	0.86	0.82	0.92	0.32	0.22	0.22
13	0.2	0.65	1	1.3	0.64	0.47	1.22	1.14	0.75	0.79	0.8	0.38	0.2	0.25
13	0.2	1.1	1	2.31	1.35	0.55	3.78	1.1	1.2	1.04	2.47	0.37	0.45	0.33
13	0.2	0.5	1	1.42	0.58	0.5	1.37	1.23	0.88	0.89	0.71	0.36	0.26	0.24
13	0.1	0.95	1	1.74	0.9	0.47	2.28	1.13	0.93	0.92	1.5	0.26	0.28	0.19
13	0.1	0.8	1	1.58	0.74	0.5	1.66	1.24	0.88	1.7	1.06	0.29	0.23	1.03
13	0.1	0.65	1	1.25	0.49	0.46	1.09	1.03	0.86	0.86	0.55	0.28	0.26	0.29
13	0.1	1.1	2	1.46	0.63	0.45	0.8	1.24	1.66	1	0.26	0.32	1.02	0.29
13	0.1	0.5	1	1.21	0.51	0.47	1.12	0.95	0.95	0.83	0.6	0.27	0.32	0.2

## Sheet: ReadMe
Descriptors relate to columns in the 'Data' tab of this file.
	P	Participant ID
	D	Obstacle depth (nondimensionalised to leg length)
	L	Obstacle length (nondimesionalised to leg length)
	t	Trial strategy code (1 = OVER; 2 = IN)
	sc	Total mechanical work (J/kg)
	sce	Centre of mass mechanical work (J/kg)
	sc_[...]	Total mechanical work (J/kg; individual step) *
	sce_[...]	Centre of mass mechanical work (J/kg; individual step) *
	sp	Speed (as dimensionless Froude number)
* suffixes indicate step number, where n is the first obstacle traversal step (i.e. the lead leg crossing step for an OVER strategy and the lead leg step-down for the IN strategy)
